# Supplementary material for: PCV2 vaccination induces IFN-γ/TNF-α co-producing T cells with a potential role in protection
Source: PubMed Central journal article supplement (PMC4348102; doi:10.1186/s13567-015-0157-4), 2015-03-03

vaccinated & infected

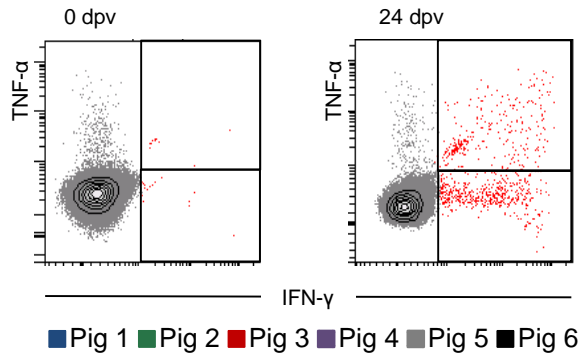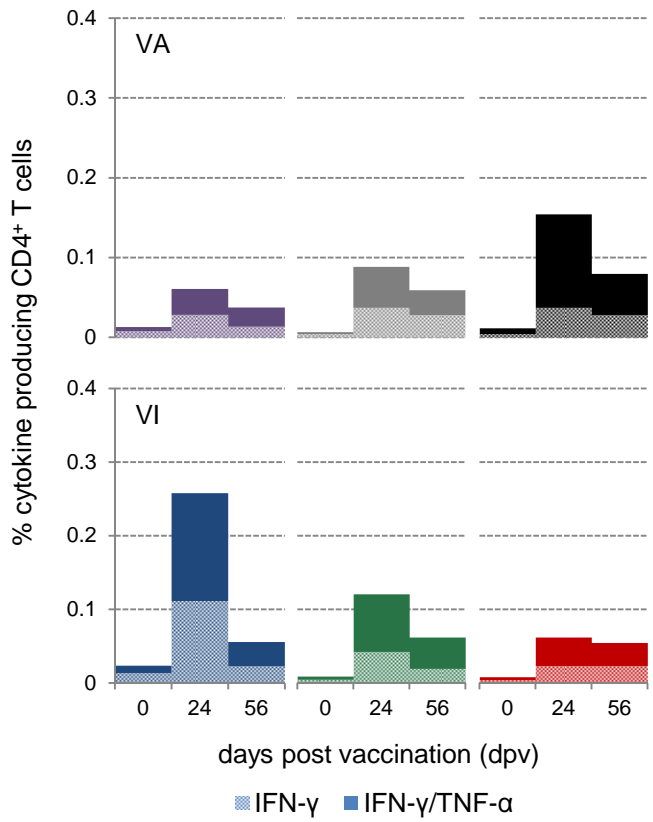

Supplement: 13567_2015_157_MOESM2_ESM.pdf [file 13567_2015_157_MOESM2_ESM.pdf]
